# Supplementary material for: En bloc transfer of polyubiquitin chains to PCNA in vitro is mediated by two different human E2–E3 pairs
Source: PubMed Central journal article supplement — Nucleic Acids Res. 2012 Aug 13;40(20):10394–407. doi: 10.1093/nar/gks763 (PMC3488225; doi:10.1093/nar/gks763), 2012-08-13
Supplement: supp_gks763_nar-01044-d-2012-File011.pdf [file supp_gks763_nar-01044-d-2012-File011.pdf]

A

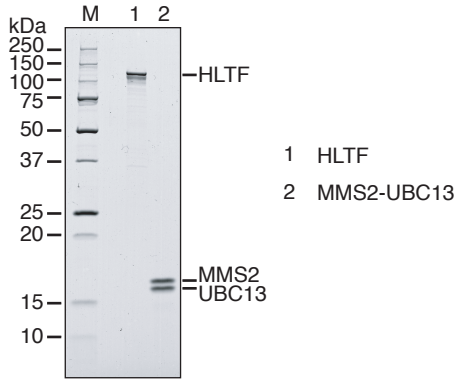

B

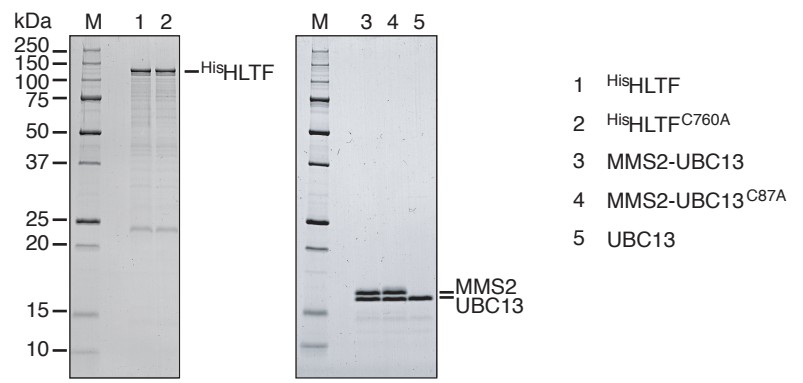

C

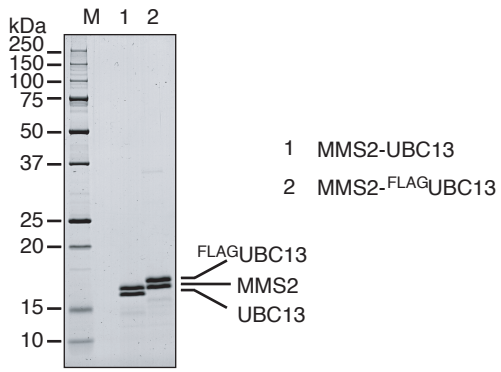

D

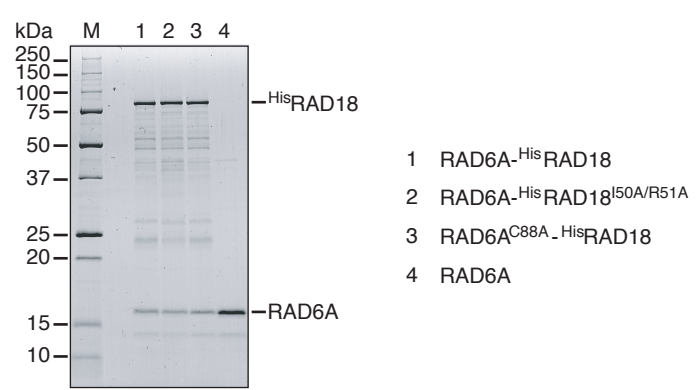

Fig. S1. Masuda et. al.

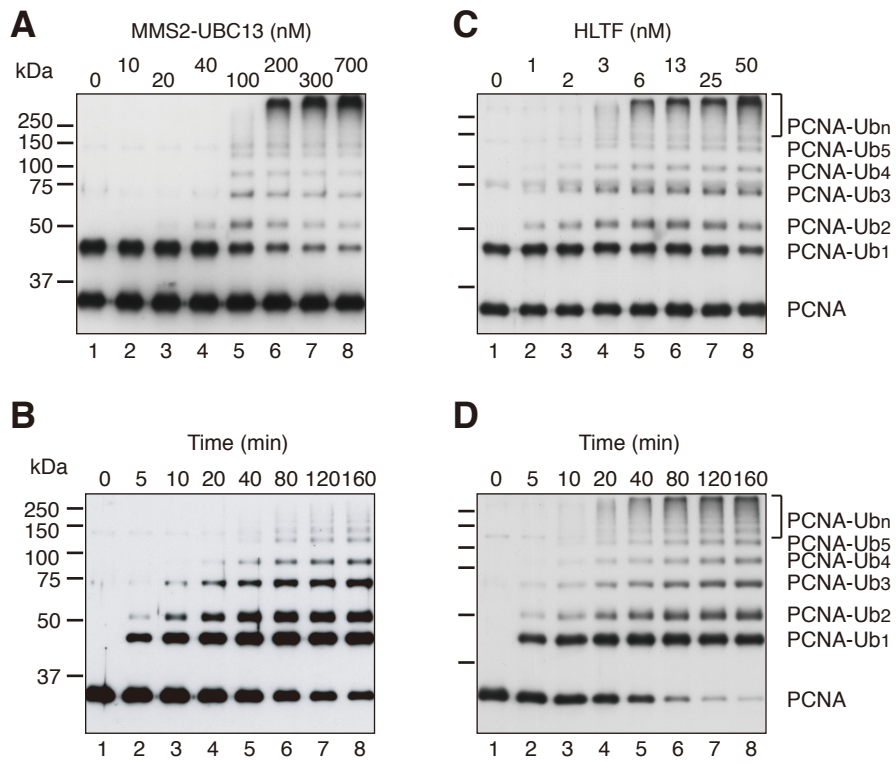

Fig. S2. Masuda et. al.

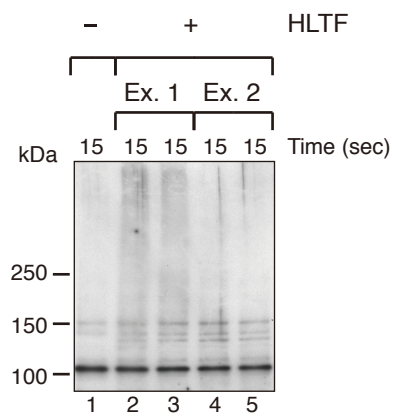

Fig. S3. Masuda et. al.

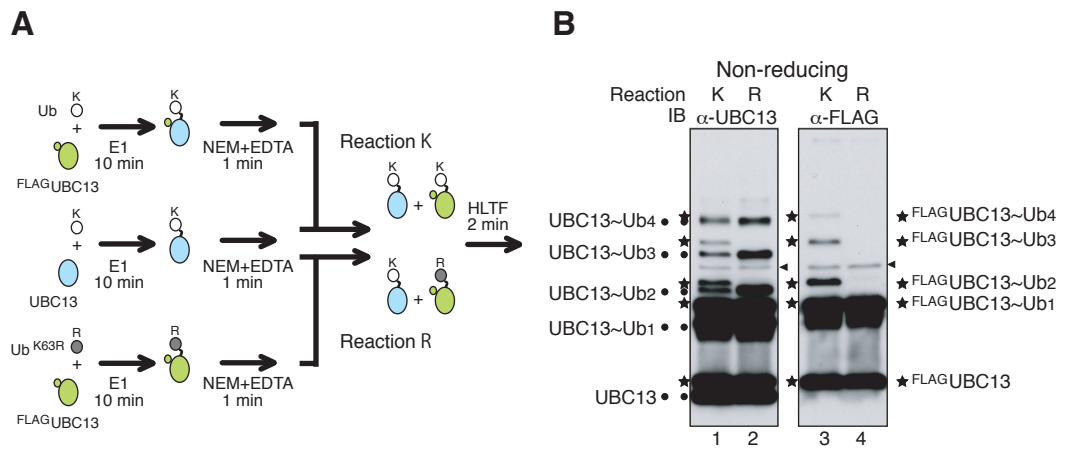

Fig. S4. Masuda et. al.

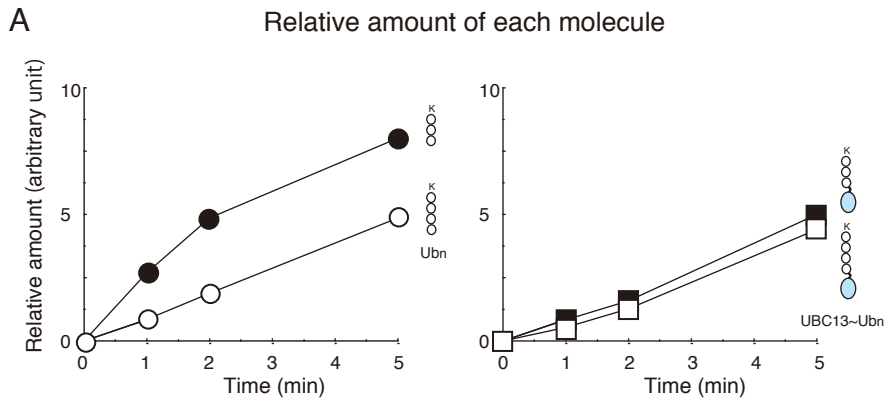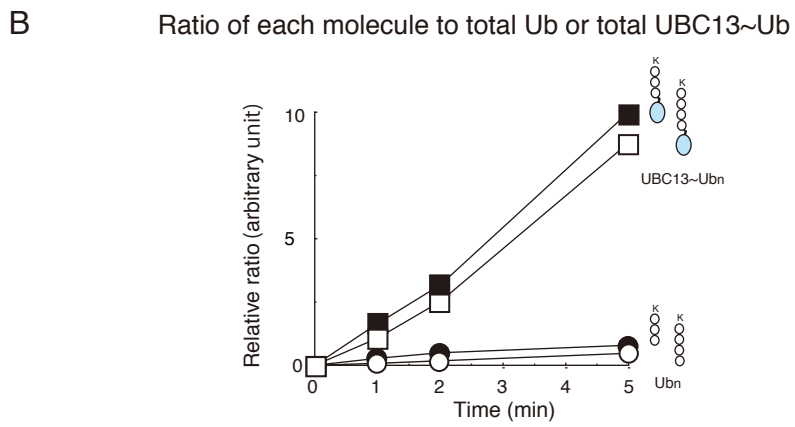

Fig. S5. Masuda et. al.

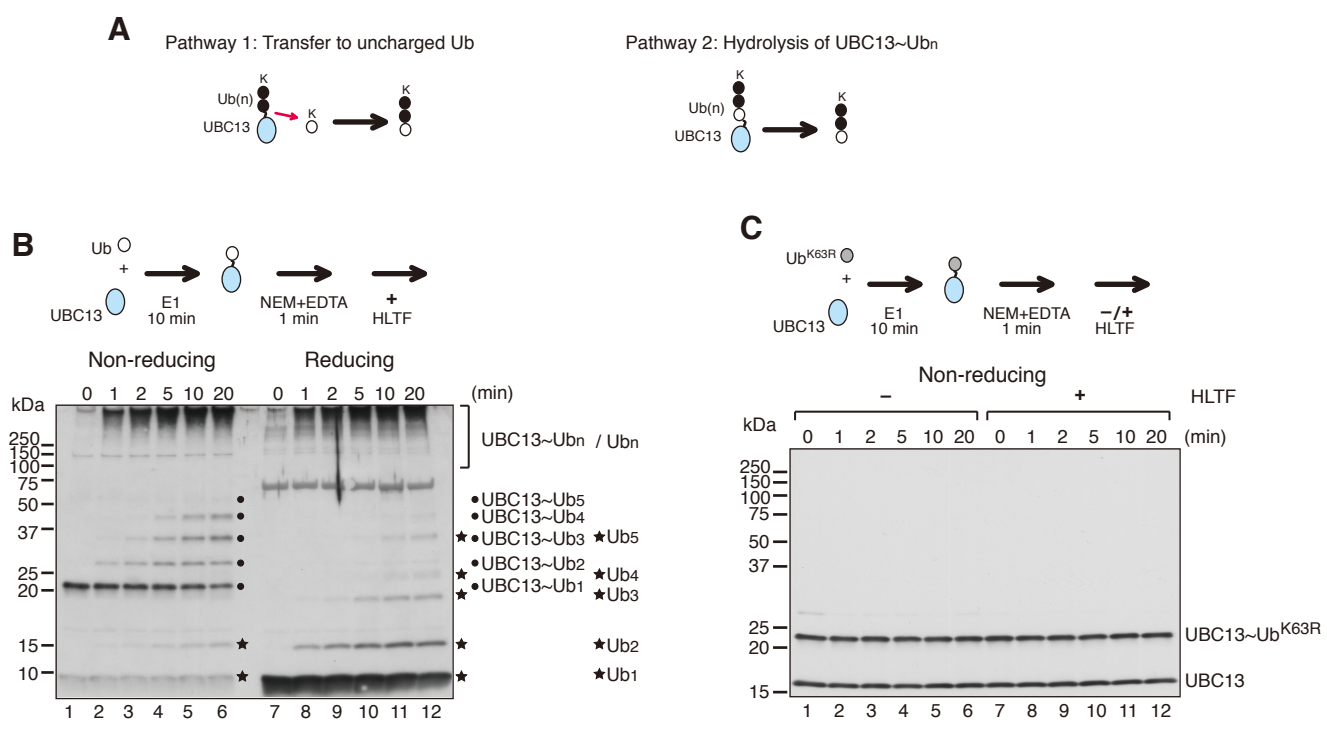

Fig. S6. Masuda et. al.

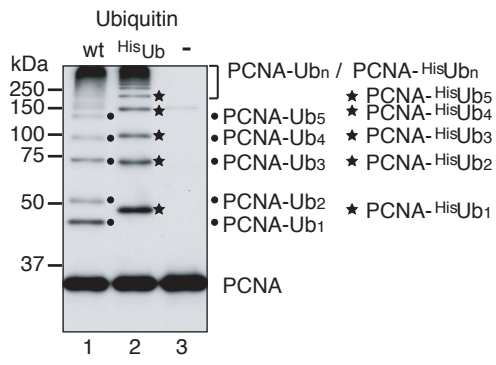

Fig. S7. Masuda et. al.

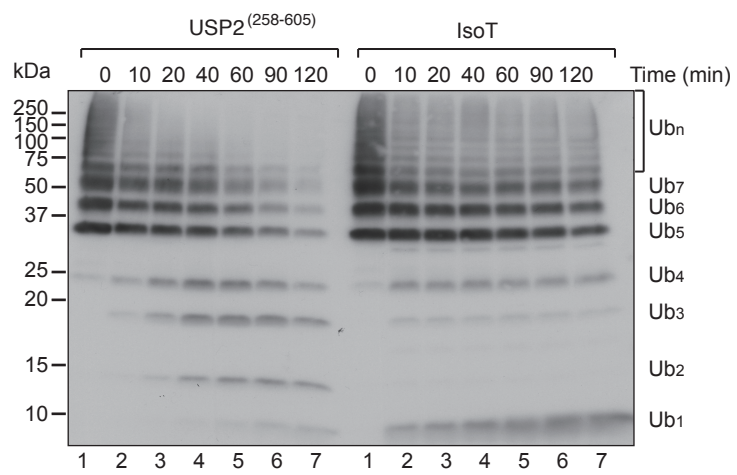

Fig. S8. Masuda et. al.



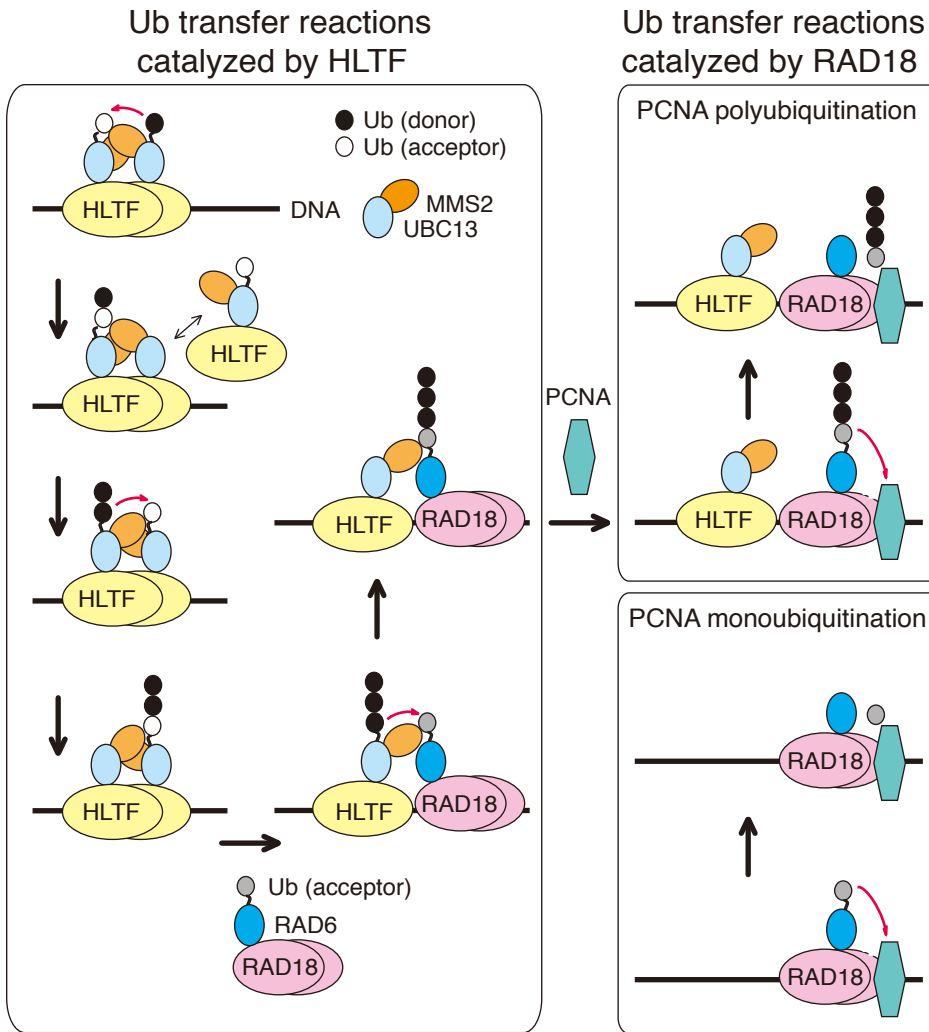

Fig. S9. Masuda et. al.

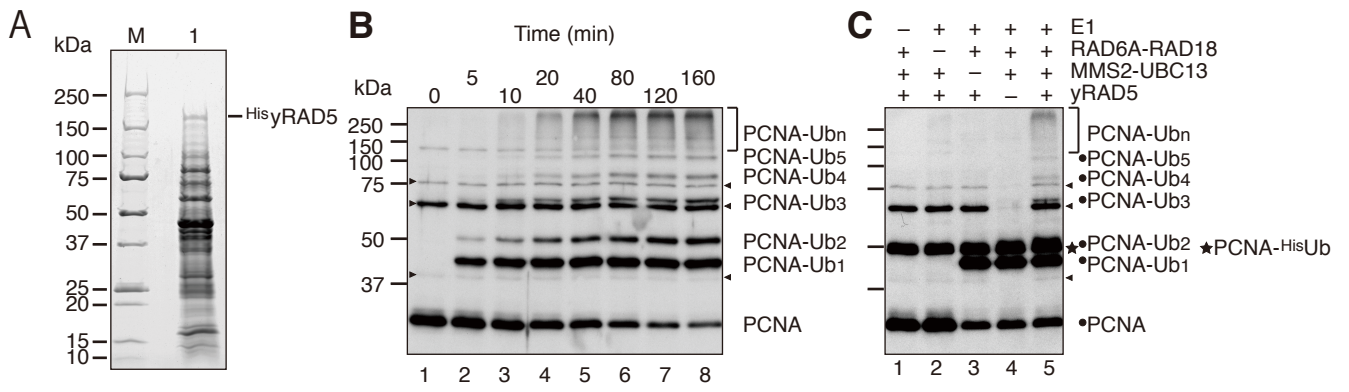

Fig. S10. Masuda et. al.
